# Supplementary material for: Determination of aflatoxin B1 in Pixian Douban based on aptamer magnetic solid-phase extraction
Source: Royal Society of Chemistry journal article supplement (doi:10.1039/d2ra02763a), 2022-01-01
Supplement: d2ra02763a1.pdf [file d2ra02763a1.pdf]

**Supporting Information for**  
**Determination of Aflatoxin B<sub>1</sub> in *Pixian Douban* based on**  
**Aptamer-Magnetic Solid-Phase extraction**

Chaoyi Zeng <sup>a,d#</sup>, Chi Xu <sup>a#</sup>, Hongyun Tian <sup>c</sup>, Kun Shao<sup>a</sup>, Yaning Song<sup>a</sup>, Xiao Yang<sup>a</sup>,  
Zhenming Che <sup>a,b</sup> and Yukun Huang

<sup>a</sup> School of Food and Biological Engineering, Chongqing Key Laboratory of Speciality Food Co-Built by Sichuan and Chongqing, Xihua University, Chengdu 610039, China

<sup>b</sup> Key Laboratory of Food Non Thermal Processing, Engineering Technology Research Center of Food Non Thermal Processing, Yibin Xihua University Research Institute, Yibin 644004, China

<sup>c</sup> Shandong Institute of Food and Drug Control, Jinan 250101, China

<sup>d</sup> Department of Food Biotechnology, Faculty of Biotechnology, Assumption University, Bangkok 10240, Thailand.

<sup>#</sup> The authors contributed equally in this work.

**Figure S1 TEM images of  $\text{Fe}_3\text{O}_4$  (a) and  $\text{Fe}_3\text{O}_4@\text{SiO}_2$  (b)**

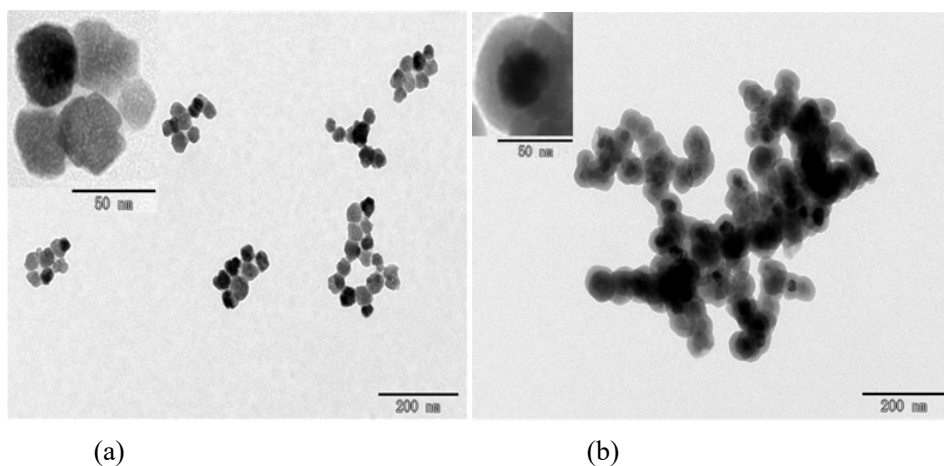

Different Morphology of  $\text{Fe}_3\text{O}_4$  before and after embedding  $\text{SiO}_2$ . Figure S1. (a) Transmission Electron Microscope of  $\text{Fe}_3\text{O}_4$ . (b) Transmission Electron Microscope of  $\text{Fe}_3\text{O}_4@\text{SiO}_2$ .

**Figure S2 Particle size distribution of  $\text{Fe}_3\text{O}_4$**

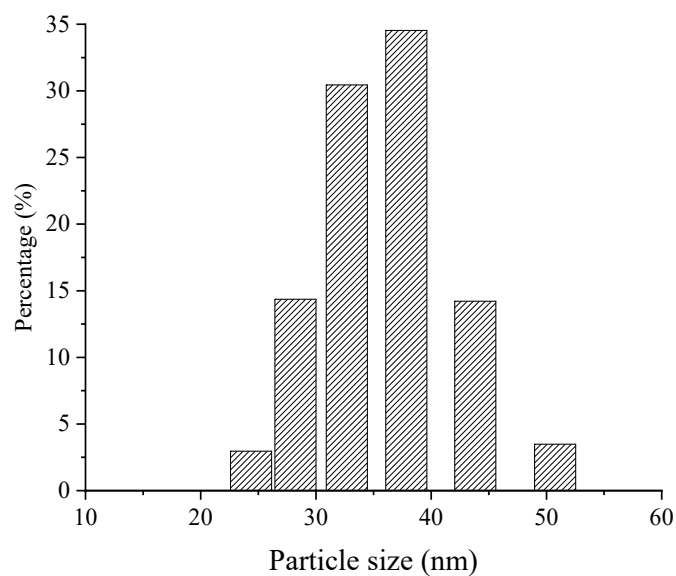

The data are the characterization of the particle size of the prepared  $\text{Fe}_3\text{O}_4$  by nano-particle size analyzer.

**Figure S3 XRD pattern of  $\text{Fe}_3\text{O}_4$**

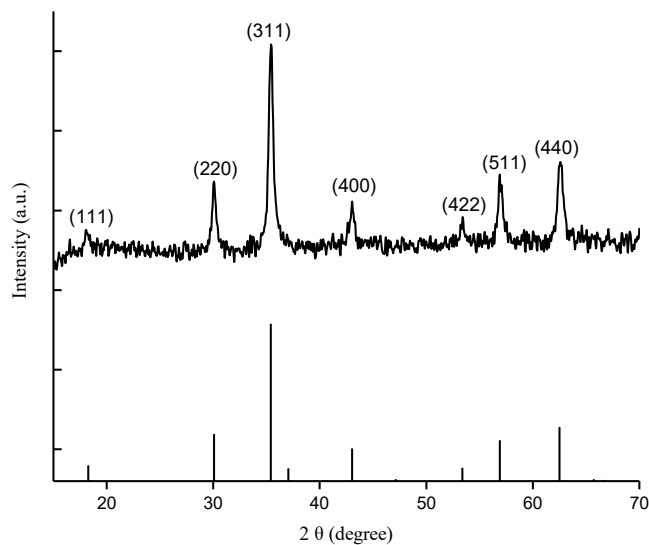

The crystal form of the prepared nano-magnetic bead  $\text{Fe}_3\text{O}_4$  was characterized by X-ray diffraction ( XRD ).

**Figure S4 The dispersion stability of  $\text{Fe}_3\text{O}_4@\text{SiO}_2$  in deionized water (a) and magnetic response to the applied magnetic field (b)**

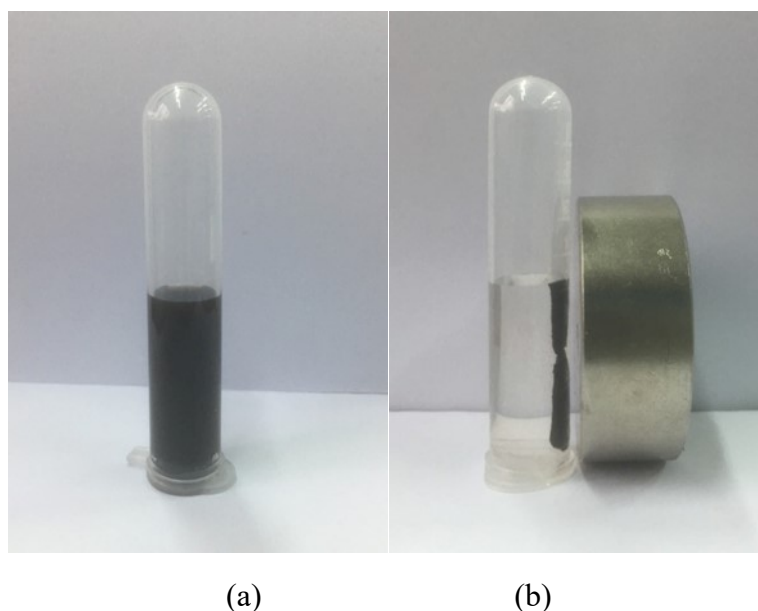

Figure S4. (a)  $\text{Fe}_3\text{O}_4@\text{SiO}_2$  dispersed uniformly in deionized water . Figure S4. (b) In the presence of an external magnetic field,  $\text{Fe}_3\text{O}_4 @ \text{SiO}_2$  can respond quickly and

gather in the direction of magnet, indicating that the  $\text{Fe}_3\text{O}_4$  surface coated with  $\text{SiO}_2$  still maintains strong magnetic properties.

**Figure S5 The FT - IR spectra of  $\text{Fe}_3\text{O}_4$  (a) and  $\text{Fe}_3\text{O}_4@\text{SiO}_2 - \text{NH}_2$  (b)**

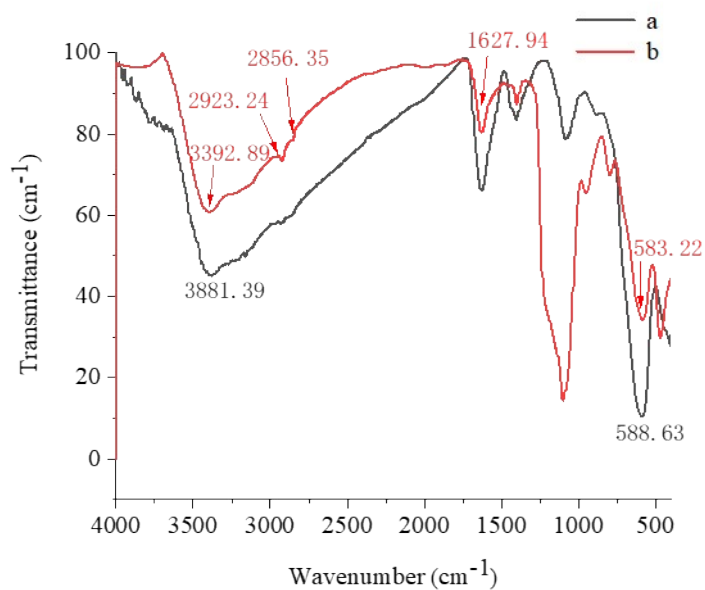

Fourier Transform Infrared Spectroscopy ( FT-IR ) Analysis of the Surface Groups of  $\text{Fe}_3\text{O}_4$  and Amino Modified Silica Magnetic Beads.

**Figure S6 UV - V is absorption spectra of avidin (a) and aptamer (b) before and after the reaction**

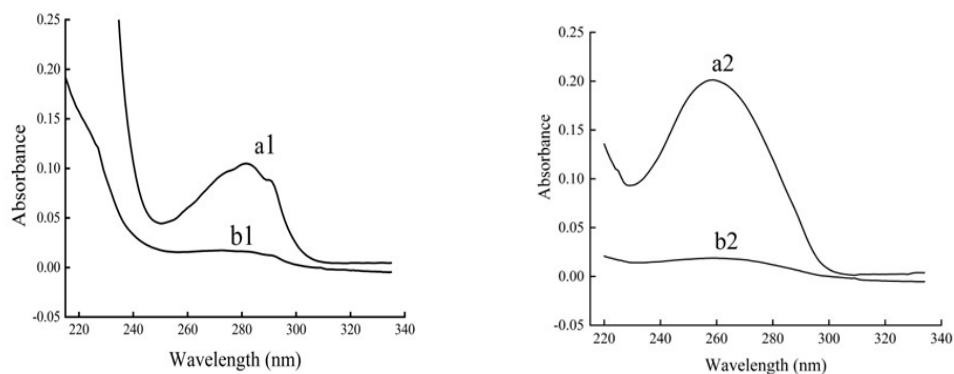

(a1) avidin stock solution; (b1) avidin solution after glutaraldehyde; (a2) aptamer solution; (b2) aptamer solution after reacting with avidinized magnetic beads.

**Figure S7 Detection of AFB<sub>1</sub> by HPLC-MS/MS. Standard curve of AFB<sub>1</sub>(a).**

**MRM chromatogram of AFB<sub>1</sub> in the Pixian Douban sample (b, c)**

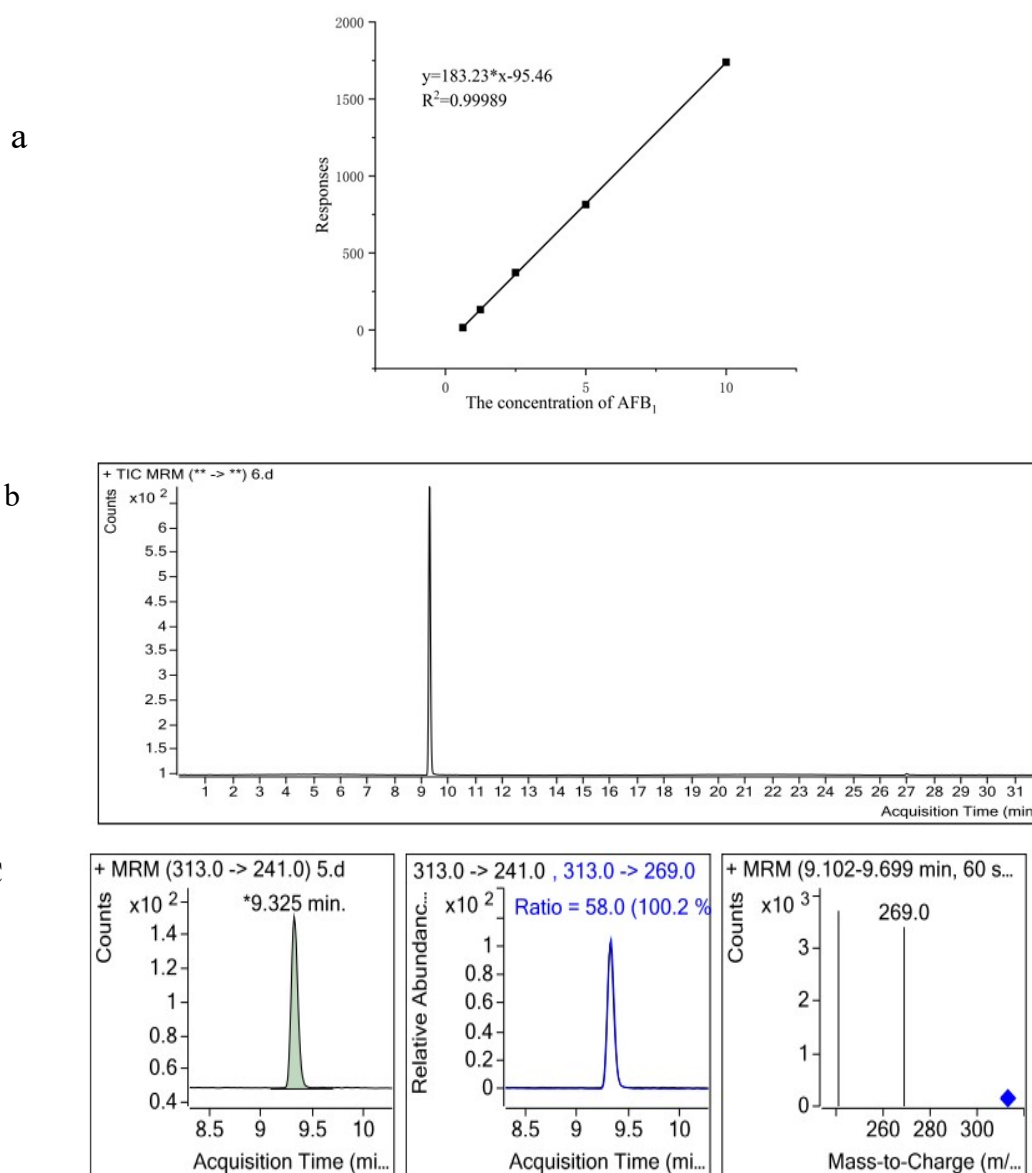

The linear equations of AFB<sub>1</sub> in blank *Pixian Douban* samples are  $y = 183.23x - 95.46$  ( $R^2 = 0.99989$ ). The mass spectrometric analysis was performed in MRM. For fragmentation of the

AFB<sub>1</sub>[M+H]<sup>+</sup> ions is 313 m/z. The detected and quantified fragment ions were: 241 and 269 m/z for AFB<sub>1</sub>.
